# Supplementary material for: Association between serum Na–Cl level and renal function decline in chronic kidney disease: results from the chronic kidney disease Japan cohort (CKD-JAC) study
Source: PubMed Central journal article supplement (PMC6510908; doi:10.1007/s10157-018-1631-x), 2018-08-24

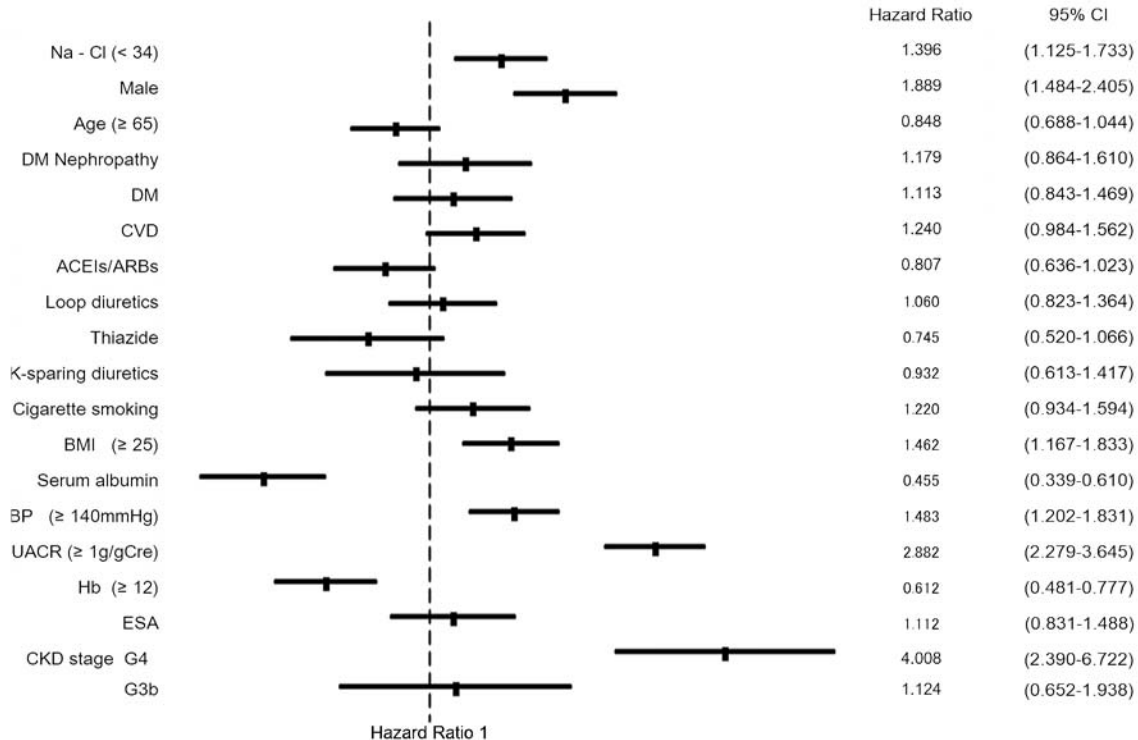

Supplement: 10157_2018_1631_MOESM2_ESM.pdf [file 10157_2018_1631_MOESM2_ESM.pdf]
